# Supplementary material for: Antitumor Effects of Blocking Protein Neddylation in T315I-BCR-ABL Leukemia Cells and Leukemia Stem Cells
Source: Oxford University Press journal article supplement (doi:10.1158/0008-5472.can-17-1733), 2018-01-10
Supplement: 00085472can171733-sup-184661_3_supp_4480357_p1xd9b.doc [file 00085472can171733-sup-184661_3_supp_4480357_p1xd9b.doc]

**Supplementary Table S2. Characteristics of patients with chronic myelogenous leukemia.**

| Patient Number | Gender/  Age (yr) | Disease  Stage | Sample | Date of Diagnosis | Prior Therapy | WBC Count (109/L) | Blast (%) | BCR-ABL- Positive |
| --- | --- | --- | --- | --- | --- | --- | --- | --- |
| 1 | F/39 | CP | BM | 6/2015 | Imatinib | 780 | 1% | + |
| 2 | M/21 | AP | PB | 10/2013 | Imatinib | 28.06 | ND | + |
| 3 | M/41 | AP | PB | 9/2012 | Hydroxyurea | 400 | ND | + |
| 4 | F/45 | AP | PB | 9/2015 | Imatinib | 249.4 | ND | + |
| 5 | F/52 | CP | BM | 1/2015 | Hydroxyurea | 44.84 | 0.24% | + |
| 6 | F/42 | CP | BM | 12/2012 | Imatinib | 2.13 | ND | + |
| 7 | M/47 | AP | BM | 7/2016 | Dasatinib resistance | 196.07 | ND | + |
| 8 | F/37 | CP | PB | 9/2016 | Initial | 42.423 | 2% | + |
| 9 | M/30 | CP | PB | 9/2016 | Initial | 46.15 | 0.03 | + |
| 10 | M/61 | CP | BM | 11/2016 | Initial | 28.08 | ND | + |
| 11 | M/21 | CP | PB | 11/2016 | Initial | 101.45 | ND | + |
| 12 | F/37 | CP | BM | 12/2016 | Initial | 185.59 | ND | + |

CP: chronic phase; AP: accelerated phase; BP: blast crisis phase; PB: peripheral blood; BM: bone marrow; WBC: white blood cells; ND: not detected.
